# Supplementary material
Source: PubMed Central journal article supplement (PMC6931914)
Supplement: Supp_Table1-4.pdf [file Supp_Table1-4.pdf]

## Supplementary Data

SUPPLEMENTARY TABLE S1. *INTERNATIONAL CLASSIFICATION OF DISEASES*, NINTH EDITION, CLINICAL MODIFICATION  
CODES USED IN THE STUDY

| <i>Clinical condition</i>                                                                                                                                                                                                                                                                                                                     | <i>ICD-9-CM codes, Elixhauser Comorbidity variables<br/>and Clinical Classification System codes</i>                                                                                                                                            |
|-----------------------------------------------------------------------------------------------------------------------------------------------------------------------------------------------------------------------------------------------------------------------------------------------------------------------------------------------|-------------------------------------------------------------------------------------------------------------------------------------------------------------------------------------------------------------------------------------------------|
| Palliative care consultation                                                                                                                                                                                                                                                                                                                  | V667                                                                                                                                                                                                                                            |
| Do not resuscitate                                                                                                                                                                                                                                                                                                                            | V4986                                                                                                                                                                                                                                           |
| Primary liver cell carcinoma                                                                                                                                                                                                                                                                                                                  | 155.0                                                                                                                                                                                                                                           |
| Liver transplantation                                                                                                                                                                                                                                                                                                                         | V427, 50.5                                                                                                                                                                                                                                      |
| ESLD, as defined by Goldberg                                                                                                                                                                                                                                                                                                                  | Presence of (1 code in chronic liver disease) + (1 code in liver cirrhosis) + (>1 code in decompensation) <sup>S1</sup>                                                                                                                         |
| Chronic liver disease: hepatitis B virus infection; hepatitis C virus infection; viral hepatitis not otherwise specified; hepatitis D with hepatitis B; alpha-1-antitrypsin deficiency; hemochromatosis; Wilson's disease; Budd-Chiari syndrome; alcohol liver disease; hepatitis, not otherwise specified; autoimmune hepatitis; cholangitis | 070.2, 070.3, 070.6, 070.7, 070.9<br>070.40, 070.41, 070.42, 070.44, 070.49<br>070.50, 070.51, 070.52, 070.54, 070.59<br>273.4, 275.0, 275.1<br>453.0<br>571.0, 571.1, 571.3, 571.4, 571.8, 571.9<br>573.0, 573.1, 573.3, 573.8, 573.9<br>576.1 |
| Cirrhosis: alcoholic; primary biliary disease; no mention of alcohol                                                                                                                                                                                                                                                                          | 571.2, 571.5, 571.6                                                                                                                                                                                                                             |
| Decompensation: ascites; spontaneous bacteria peritonitis; jaundice; hepatic encephalopathy; hepatorenal syndrome; variceal bleeding; portal hypertension                                                                                                                                                                                     | 456.0, 456.20, 456.1, 456.21<br>789.51, 789.59<br>572.2, 567.0, 567.21, 567.22, 567.23, 567.29, 567.89, 567.9<br>572.4                                                                                                                          |
| Protein–energy/calorie malnutrition                                                                                                                                                                                                                                                                                                           | 260.x, 261.x, 262.x, 263.x, 269.8, 799.4, 783.3, 783.21,<br>783.22, 783.7                                                                                                                                                                       |
| Charlson–Deyo comorbidities                                                                                                                                                                                                                                                                                                                   | S2                                                                                                                                                                                                                                              |

ESLD, end-stage liver disease; ICD-9-CM, *International Classification of Diseases*, Ninth Edition, Clinical Modification.

SUPPLEMENTARY TABLE S2. CHARACTERISTICS OF PATIENTS HOSPITALIZED WITH END-STAGE LIVER DISEASE CATEGORIZED BY 30- AND 90-DAY READMISSION STATUS, NATIONAL READMISSIONS DATABASE 2010–2014

| Variables                           | All-cause 30 days readmission |               |         | All-cause 90 days readmission |               |         |
|-------------------------------------|-------------------------------|---------------|---------|-------------------------------|---------------|---------|
|                                     | No                            | Yes           | p       | No                            | Yes           | p       |
| Number (%)                          | 43,608 (65.1)                 | 23,872 (34.9) | <0.0001 | 31,931 (47.7)                 | 35,549 (52.3) | <0.0001 |
| Age, years, mean (SD)               | 56.4 (10.5)                   | 55.7 (10.3)   | <0.0001 | 56.6 (10.6)                   | 55.8 (10.3)   | <0.0001 |
| Sex (%)                             |                               |               | 0.5059  |                               |               | 0.04    |
| Female                              | 34.5                          | 34.8          |         | 34.1                          | 35.0          |         |
| Male                                | 65.5                          | 65.2          |         | 65.9                          | 65.0          |         |
| DNR (%)                             | 7.3                           | 3.6           | <0.0001 | 8.9                           | 3.4           | <0.0001 |
| Hepatocellular carcinoma (%)        | 9.1                           | 8.6           | 0.0380  | 9.8                           | 8.1           | <0.0001 |
| Liver transplant (%)                | 0.4                           | 0.4           | 0.6117  | 0.4                           | 0.4           | 0.3620  |
| Insurance (%)                       |                               |               | <0.0001 |                               |               | <0.0001 |
| Medicare                            | 34.7                          | 35.7          |         | 33.9                          | 36.1          |         |
| Medicaid                            | 26.9                          | 31.8          |         | 25.8                          | 31.1          |         |
| Private                             | 25.1                          | 22.9          |         | 26.0                          | 22.9          |         |
| Self-pay and others                 | 13.3                          | 9.6           |         | 14.3                          | 10.0          |         |
| Median household income (%)         |                               |               | 0.0280  |                               |               | 0.0619  |
| First quartile (lowest)             | 32.2                          | 31.5          |         | 31.8                          | 32.1          |         |
| Second quartile                     | 27.1                          | 26.8          |         | 27.3                          | 26.7          |         |
| Third quartile                      | 23.3                          | 23.1          |         | 23.6                          | 22.9          |         |
| Fourth quartile (highest)           | 17.4                          | 18.6          |         | 17.3                          | 18.2          |         |
| Hospital bed size (%)               |                               |               | 0.2986  |                               |               | 0.4449  |
| Small                               | 9.5                           | 9.1           |         | 9.5                           | 9.3           |         |
| Medium                              | 22.5                          | 22.0          |         | 22.5                          | 22.1          |         |
| Large                               | 68.0                          | 68.9          |         | 67.9                          | 68.6          |         |
| Hospital location (%)               |                               |               | <0.0001 |                               |               | <0.0001 |
| Large metropolitan                  | 61.3                          | 65.8          |         | 59.8                          | 65.7          |         |
| Small metropolitan                  | 32.6                          | 29.3          |         | 33.8                          | 29.3          |         |
| Micropolitan                        | 5.1                           | 4.0           |         | 5.3                           | 4.2           |         |
| Nonmicro/metropolitan               | 1.0                           | 0.9           |         | 1.1                           | 0.9           |         |
| Hospital teaching status (%)        |                               |               | <0.0001 |                               |               | <0.0001 |
| Metropolitan nonteaching            | 29.7                          | 28.8          |         | 30.3                          | 28.5          |         |
| Metropolitan teaching               | 64.2                          | 66.4          |         | 63.3                          | 66.4          |         |
| Nonmetropolitan                     | 6.1                           | 4.9           |         | 6.4                           | 5.1           |         |
| Hospital ownership (%)              |                               |               | 0.3091  |                               |               | 0.3221  |
| Government                          | 15.7                          | 14.9          |         | 15.7                          | 15.2          |         |
| Private, nonprofit                  | 71.1                          | 72.0          |         | 71.0                          | 71.8          |         |
| Private, profit                     | 13.2                          | 13.1          |         | 13.3                          | 13.0          |         |
| Weekend admission (%)               | 22.6                          | 22.8          | 0.7181  | 22.6                          | 22.8          | 0.5929  |
| Discharge disposition (%)           |                               |               | <0.0001 |                               |               | <0.0001 |
| Home, home with hospice             | 79.0                          | 81.1          |         | 77.0                          | 82.2          |         |
| Left against medical advice         | 1.7                           | 2.9           |         | 1.5                           | 2.7           |         |
| Skilled nursing facility            | 19.4                          | 16.0          |         | 21.6                          | 15.1          |         |
| Charlson–Deyo comorbidity index (%) |                               |               | 0.3158  |                               |               | <0.0001 |
| Index: 0                            | 40.0                          | 36.7          |         | 40.7                          | 37.2          |         |
| Index: 1–3                          | 42.5                          | 44.7          |         | 41.2                          | 45.2          |         |
| Index: >3                           | 17.5                          | 18.6          |         | 18.1                          | 17.7          |         |

Self-pay and others, individuals without a health insurance or paying health fees out of pocket.

Large metropolitan (population ≥1,000,000), small metropolitan (population between 50,000 and 1,000,000), micropolitan (population between 10,000 and 50,000), non micro-/metropolitan (population <10,000).

Charlson–Deyo index was calculated excluding ESLD and hepatocellular carcinoma for this study.

DNR, do not resuscitate.

SUPPLEMENTARY TABLE S3. FACTORS ASSOCIATED WITH RECEIVING PALLIATIVE CARE CONSULTATION BEFORE AND AFTER PROPENSITY MATCHING, NATIONAL READMISSIONS DATABASE 2010–2014

| Variables                                       | Before propensity matching |      |       |         | After propensity matching |      |      |        |
|-------------------------------------------------|----------------------------|------|-------|---------|---------------------------|------|------|--------|
|                                                 | aOR                        | LCL  | UCL   | p       | aOR                       | LCL  | UCL  | p      |
| Age                                             |                            |      |       |         |                           |      |      |        |
| Per 10-year increase                            | 1.08                       | 1.02 | 1.15  | 0.0091  | 0.98                      | 0.93 | 1.04 | 0.588  |
| Sex                                             |                            |      |       |         |                           |      |      |        |
| Female vs. male                                 | 1.03                       | 0.93 | 1.14  | 0.5588  | 1.02                      | 0.91 | 1.13 | 0.7595 |
| DNR                                             | 10.01                      | 8.67 | 11.55 | <0.0001 | 1.11                      | 0.98 | 1.26 | 0.1145 |
| Hepatocellular carcinoma                        | 3.00                       | 2.41 | 3.73  | <0.0001 | 1.11                      | 0.93 | 1.33 | 0.2361 |
| Liver transplant                                | 0.08                       | 0.04 | 0.16  | <0.0001 | 1.62                      | 0.53 | 4.93 | 0.3991 |
| Complications of ESKD                           |                            |      |       |         |                           |      |      |        |
| Ascites                                         | 1.41                       | 1.18 | 1.69  | 0.0002  | 0.98                      | 0.82 | 1.17 | 0.8025 |
| Variceal bleed                                  | 0.89                       | 0.79 | 0.99  | 0.0364  | 0.97                      | 0.86 | 1.09 | 0.5676 |
| Hepatorenal syndrome                            | 2.41                       | 2.15 | 2.70  | <0.0001 | 1.00                      | 0.89 | 1.12 | 0.9317 |
| Hepatic encephalopathy                          | 1.49                       | 1.31 | 1.69  | <0.0001 | 0.98                      | 0.87 | 1.10 | 0.7436 |
| Portal hypertension                             | 0.89                       | 0.81 | 0.99  | 0.0251  | 1.02                      | 0.92 | 1.13 | 0.7117 |
| Jaundice                                        | 1.30                       | 1.10 | 1.54  | 0.0027  | 1.00                      | 0.84 | 1.20 | 0.9652 |
| Spontaneous bacterial peritonitis               | 1.29                       | 1.13 | 1.47  | 0.0002  | 0.96                      | 0.84 | 1.09 | 0.5169 |
| Protein–energy malnutrition                     | 2.04                       | 1.63 | 2.55  | <0.0001 | 1.06                      | 0.87 | 1.29 | 0.5648 |
| Insurance                                       |                            |      |       | 0.0003  |                           |      |      | 0.2872 |
| Medicaid vs. Medicare                           | 1.09                       | 0.95 | 1.25  |         | 1.08                      | 0.94 | 1.24 |        |
| Private vs. Medicare                            | 0.96                       | 0.83 | 1.11  |         | 1.14                      | 0.99 | 1.31 |        |
| Self-pay and others vs. Medicare                | 1.40                       | 1.17 | 1.66  |         | 1.13                      | 0.96 | 1.35 |        |
| Income                                          |                            |      |       | 0.0262  |                           |      |      | 0.7376 |
| Second quartile vs. lowest quartile             | 0.84                       | 0.74 | 0.96  |         | 1.00                      | 0.87 | 1.14 |        |
| Third quartile vs. lowest quartile              | 0.95                       | 0.82 | 1.09  |         | 0.95                      | 0.83 | 1.09 |        |
| Highest quartile vs. lowest quartile            | 0.86                       | 0.74 | 0.99  |         | 1.03                      | 0.89 | 1.19 |        |
| Hospital bed size                               |                            |      |       | 0.4401  |                           |      |      | 0.2281 |
| Medium vs. small                                | 1.23                       | 0.88 | 1.72  |         | 1.04                      | 0.85 | 1.27 |        |
| Large vs. small                                 | 1.14                       | 0.84 | 1.55  |         | 1.13                      | 0.94 | 1.35 |        |
| Hospital urban–rural designation                |                            |      |       | 0.024   |                           |      |      | 0.5577 |
| Small metropolitan vs. large metropolitan       | 1.18                       | 1.03 | 1.34  |         | 1.03                      | 0.92 | 1.15 |        |
| Micropolitan vs. large metropolitan             | 0.59                       | 0.43 | 0.82  |         | 1.08                      | 0.80 | 1.45 |        |
| Nonmicro/metropolitan vs. large metropolitan    | 0.36                       | 0.16 | 0.79  |         | 1.94                      | 0.61 | 6.21 |        |
| Hospital teaching status                        |                            |      |       |         |                           |      |      |        |
| Nonteaching vs. teaching                        | 0.81                       | 0.70 | 0.93  | 0.0028  | 0.97                      | 0.87 | 1.08 | 0.5906 |
| Hospital control                                |                            |      |       | 0.0683  |                           |      |      | 0.7439 |
| Private, nonprofit vs. government               | 1.03                       | 0.88 | 1.20  |         | 1.05                      | 0.92 | 1.19 |        |
| Private, profit vs. government                  | 0.73                       | 0.54 | 0.99  |         | 1.00                      | 0.81 | 1.23 |        |
| Weekend admission                               | 1.03                       | 0.92 | 1.14  | 0.6184  | 0.98                      | 0.87 | 1.09 | 0.6678 |
| Discharge disposition                           |                            |      |       | <0.0001 |                           |      |      | 0.809  |
| Home/routine vs. nonroutine                     | 0.40                       | 0.35 | 0.44  |         | 1.04                      | 0.93 | 1.15 |        |
| LAMA vs. nonroutine                             | 0.15                       | 0.09 | 0.25  |         | 1.00                      | 0.52 | 1.93 |        |
| Charlson–Deyo comorbidity index                 |                            |      |       | <0.0001 |                           |      |      | 0.149  |
| Deyo: 1–3 vs. 0                                 | 1.10                       | 0.97 | 1.25  |         | 0.94                      | 0.81 | 1.08 |        |
| Deyo: >3 vs. 0                                  | 1.86                       | 1.51 | 2.29  |         | 0.82                      | 0.66 | 1.01 |        |
| Acquired immune deficiency syndrome             | 1.23                       | 0.69 | 2.19  | 0.4922  | 0.71                      | 0.44 | 1.14 | 0.1536 |
| Alcohol abuse                                   | 1.22                       | 1.10 | 1.35  | 0.0001  | 0.89                      | 0.80 | 1.00 | 0.0399 |
| Chronic deficiency anemia                       | 0.96                       | 0.87 | 1.05  | 0.3538  | 0.96                      | 0.87 | 1.06 | 0.4179 |
| Rheumatoid arthritis/collagen vascular diseases | 0.84                       | 0.56 | 1.27  | 0.4174  | 1.04                      | 0.68 | 1.60 | 0.8535 |
| Chronic blood loss anemia                       | 0.88                       | 0.70 | 1.11  | 0.2831  | 1.09                      | 0.85 | 1.40 | 0.5155 |
| Congestive heart failure                        | 1.02                       | 0.84 | 1.25  | 0.8443  | 0.88                      | 0.73 | 1.06 | 0.1846 |
| Chronic pulmonary disease                       | 0.97                       | 0.85 | 1.12  | 0.6999  | 0.97                      | 0.84 | 1.12 | 0.6479 |
| Coagulation disorders                           | 1.14                       | 1.03 | 1.26  | 0.011   | 1.05                      | 0.95 | 1.15 | 0.3793 |
| Depression                                      | 1.09                       | 0.96 | 1.24  | 0.1894  | 0.97                      | 0.84 | 1.13 | 0.7126 |
| Uncomplicated diabetes mellitus                 | 0.90                       | 0.79 | 1.02  | 0.1063  | 1.00                      | 0.88 | 1.15 | 0.9685 |
| Complicated diabetes mellitus                   | 0.69                       | 0.54 | 0.88  | 0.0026  | 1.11                      | 0.87 | 1.42 | 0.412  |
| Drug abuse                                      | 1.19                       | 1.02 | 1.39  | 0.0286  | 0.98                      | 0.84 | 1.14 | 0.7517 |
| Hypertension                                    | 0.93                       | 0.84 | 1.04  | 0.1921  | 0.99                      | 0.90 | 1.10 | 0.9073 |

(continued)

SUPPLEMENTARY TABLE S3. (CONTINUED)

| Variables                       | Before propensity matching |      |      |         | After propensity matching |      |      |        |
|---------------------------------|----------------------------|------|------|---------|---------------------------|------|------|--------|
|                                 | aOR                        | LCL  | UCL  | p       | aOR                       | LCL  | UCL  | p      |
| Hypothyroidism                  | 0.90                       | 0.76 | 1.07 | 0.2343  | 1.06                      | 0.89 | 1.26 | 0.5075 |
| Lymphoma                        | 1.20                       | 0.77 | 1.85 | 0.4192  | 0.88                      | 0.54 | 1.43 | 0.6067 |
| Fluid and electrolyte disorders | 1.33                       | 1.20 | 1.47 | <0.0001 | 0.94                      | 0.84 | 1.05 | 0.2612 |
| Metastatic cancer               | 1.56                       | 1.10 | 2.20 | 0.0119  | 0.94                      | 0.73 | 1.22 | 0.6541 |
| Chronic neurological disorders  | 1.03                       | 0.81 | 1.30 | 0.8324  | 0.94                      | 0.78 | 1.14 | 0.5316 |
| Obesity                         | 0.91                       | 0.76 | 1.08 | 0.2574  | 1.06                      | 0.89 | 1.27 | 0.5263 |
| Paralysis                       | 0.95                       | 0.63 | 1.43 | 0.8109  | 1.10                      | 0.68 | 1.79 | 0.7031 |
| Peripheral vascular disorders   | 0.73                       | 0.55 | 0.97 | 0.0319  | 0.93                      | 0.70 | 1.23 | 0.6004 |
| Psychoses                       | 1.05                       | 0.87 | 1.27 | 0.5861  | 0.98                      | 0.80 | 1.21 | 0.8797 |
| Pulmonary circulatory disorders | 1.15                       | 0.86 | 1.53 | 0.3456  | 1.11                      | 0.84 | 1.48 | 0.4543 |
| Chronic renal failure           | 1.08                       | 0.93 | 1.24 | 0.316   | 0.92                      | 0.80 | 1.05 | 0.206  |
| Solid tumor (no metastasis)     | 0.90                       | 0.71 | 1.14 | 0.3863  | 0.84                      | 0.69 | 1.02 | 0.0822 |
| Peptic ulcer (no bleeding)      | 0.79                       | 0.22 | 2.84 | 0.7177  | 1.00                      | 0.18 | 5.51 | 0.9993 |
| Valvular diseases               | 0.91                       | 0.69 | 1.21 | 0.5181  | 1.07                      | 0.81 | 1.42 | 0.6384 |
| Weight loss                     | 0.76                       | 0.60 | 0.97 | 0.0247  | 0.91                      | 0.74 | 1.12 | 0.3627 |

Self-pay and others, individuals without a health insurance or paying health fees out of pocket.

Large metropolitan (population ≥1,000,000), small metropolitan (population between 50,000 and 1,000,000), micropolitan (population between 10,000 and 50,000), non micro-/metropolitan (population <10,000).

Charlson–Deyo index was calculated excluding ESLD and hepatocellular carcinoma for this study.

aOR, adjusted odds ratio; LCL, lower confidence limit; UCL, upper confidence limit.

SUPPLEMENTARY TABLE S4. IMPACT OF PALLIATIVE CARE CONSULTATION ON READMISSION RATE AND OUTCOMES DURING READMISSIONS AMONG PATIENTS WITH END-STAGE LIVER DISEASE, NATIONAL READMISSIONS DATABASE 2010–2014

|                                                    | PCC vs. no-PCC   | p       |
|----------------------------------------------------|------------------|---------|
| Readmission rate, relative risk (95% CI)           |                  |         |
| 30-day                                             | 0.45 (0.41–0.50) | <0.0001 |
| 90-day                                             | 0.42 (0.39–0.46) | <0.0001 |
| Readmission mortality rate, relative risk (95% CI) |                  |         |
| 30-day                                             | 1.41 (1.14–1.74) | <0.0001 |
| 90-day                                             | 1.53 (1.27–1.85) | <0.0001 |
| Length of stay, mean ratio (95% CI)                |                  |         |
| 30-day                                             | 0.75 (0.66–0.87) | <0.0001 |
| 90-day                                             | 0.83 (0.73–0.94) | <0.0001 |
| Hospital cost, mean ratio (95% CI)                 |                  |         |
| 30-day                                             | 0.64 (0.53–0.78) | <0.0001 |
| 90-day                                             | 0.70 (0.60–0.83) | <0.0001 |
| Readmission rate, hazard ratio (95% CI)            |                  |         |
| 30-day                                             | 0.42 (0.38–0.47) | <0.0001 |
| 90-day                                             | 0.38 (0.34–0.42) | <0.0001 |

CI, confidence interval; PCC, palliative care consultation.

#### Supplementary References

- S1. Goldberg D, Lewis J, Halpern S, et al. Validation of a coding algorithm to identify patients with end-stage liver disease in an administrative database. *Pharmacoepidemiol Drug Saf* 2012;21:765–769.
- S2. Quan H, Sundararajan V, Halfon P, et al. Coding algorithms for defining comorbidities in ICD-9-CM and ICD-10 administrative data. *Med Care* 2005;43:1130–1139.
